# Supplementary material for: Fructosamine and Hemoglobin A1c Correlations in HIV-Infected Adults in Routine Clinical Care: Impact of Anemia and Albumin Levels
Source: Hindawi journal article supplement (doi:10.1155/2015/478750), 2015-01-01
Supplement: f1 [file 478750.f1.pdf]

**Supplement Table 1.** Correlation between HbA1c and Albumin corrected Fructosamine by Albumin and Hemoglobin quartile

|            | Percentile     | 0   | 25   | 50   | 75   | 100  |
|------------|----------------|-----|------|------|------|------|
| Albumin    | g/dL           | 1.3 | 3.6  | 3.9  | 4.2  | 5.1  |
|            | Spearman's rho |     | 0.75 | 0.74 | 0.77 | 0.67 |
| Hemoglobin | g/dL           | 6.7 | 12.7 | 14   | 15.2 | 17.9 |
|            | Spearman's rho |     | 0.64 | 0.68 | 0.73 | 0.75 |

corrected fructosamine (mmol/l)=(measured fructosamine + 0.03 (40-serum albumin g/l), mmol/L[20].

**Supplement Table 2.** Correlation between HbA1c and fructosamine by diabetes severity level as measured by HbA1c

|                |       |         |      |
|----------------|-------|---------|------|
| HbA1c (%)      | <5.7  | 5.7-6.4 | ≥6.5 |
| Spearman's rho | -0.08 | 0.16    | 0.68 |
